# Supplementary material for: Molecular and textural engineering of conjugated carbon nitride catalysts for selective oxidation of alcohols with visible light
Source: Royal Society of Chemistry journal article supplement (doi:10.1039/c3sc51203g), 2013-01-01
Supplement: c3sc51203g.pdf [file c3sc51203g.pdf]

Electronic Supplementary Information

**Molecular and Textural Engineering of Conjugated Carbon Nitride Catalysts for Selective Oxidation of Alcohols with Visible Light**

**Yan Chen, Jinshui Zhang, Mingwen Zhang and Xinchun Wang\***

Research Institute of Photocatalysis, Fujian Provincial Key Laboratory of Photocatalysis-State Key Laboratory Breeding Base, and College of Chemistry and Chemical Engineering, Fuzhou University, Fuzhou 350002, P. R. China.

**Synthesis of photocatalysts**

ATCN was prepared according to the reported.<sup>1</sup> For catalysts synthesis, 3 g DCDA was mixed with different amounts of ATCN and 12 nm SiO<sub>2</sub> in 15 mL water with stirring at 60 °C to remove water. The resultant solids were calcined at 550 °C for 4 h in air to obtain the final samples. The template was subsequently removed using NH<sub>4</sub>HF<sub>2</sub> (4M), followed by filtered, washed with water and ethanol several times, and finally dried at 60 °C overnight. The samples thus obtained were denoted as MCN-ATCN<sub>x</sub>, where x (0.01, 0.05 and 0.1) is the weight-in amount of ATCN. The pristine sample MCN was obtained following the same procedure just without ATCN.

**Characterization**

X-ray diffraction measurements were collected on a Bruker D8 Advance diffractometer with Cu Kα1 radiation ( $\lambda$  = 1.5406 Å). Fourier transformed infrared (FTIR) spectra were recorded using a Nicolet Magna 670 FTIR spectrometer. Nitrogen adsorption-desorption isotherms were performed at 77 K using Micromeritics ASAP 2010 equipment. The UV/Vis diffuse reflectance spectra (DRS) were measured on a Varian Cary 500 Scan UV/Vis system. Photoluminescence (PL) spectra were recorded on an Edinburgh FI/FSTCSPC 920 spectrophotometer. Electron paramagnetic resonance (EPR) measurements were recorded using a Bruker model A300 spectrometer with a 300W Xe lamp equipped with an IR-cut-off filter ( $\lambda$  < 800 nm) and an UV-cut-off ( $\lambda$  > 420 nm) as visible light source. Transmission electron microscopy (TEM) was obtained using a JEOL model JEM 2010 EX instrument.

**Photocatalytic test**

The photocatalytic selective oxidation of various alcohols was performed as follows. The reaction was carried out at 1 bar pressure of oxygen, in a 10 mL Pyrex glass reactor fitted with a reflux condenser, oil bath, thermocouple, and magnetic stirrer. A typical reaction condition was 1.5 mL of benzotrifluoride (BTF), 0.1 mmol alcohol, 5 mg of catalysts; reaction temperature is 60 °C and reaction time is 3 h. To carry out the photochemical reaction, a 300 W Xenon lamp together with a 420 nm cut-off filter was used as a visible light source for the irradiation of reaction system. After the reaction, the mixture was centrifuged at 12000 rpm for 10 min to completely remove the catalyst particles. The remaining solution was analyzed with an Agilent Gas Chromatograph (GC-7820). The assignment of products was confirmed by a Hewlett-Packard Gas Chromatograph/Mass Spectrometer (HP-5973GC/MS).

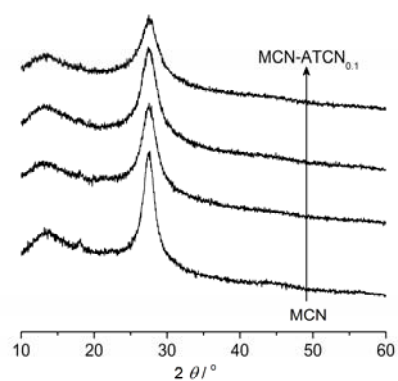

**Fig. S1.** XRD patterns for MCN and MACN

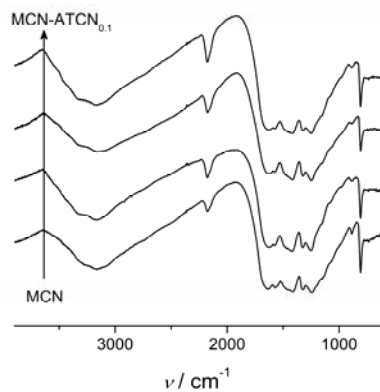

**Fig. S2.** FTIR patterns for MCN and MACN

#### Reference

- [1] Y.H. Song, B.S. Jo, J. Heterocyclic Chem. 46 (2009) 1132.
